# Supplementary material
Source: HighWire-hosted journal article supplement (https://bmjopen.bmj.com/content/12/6/e059263)
Supplement: inline-supplementary-material-1 [file inline-supplementary-material-1.pdf]

## Supplementary Files

**Supplementary Table 1:** Univariable analysis of factors associated with hospital length of stay, using a conventional Cox regression model to obtain a cause-specific hazard ratio, and the Fine and Gray competing-risks method to obtain a subdistribution hazard ratio, adjusting for health facility structures.

|                                          | Whole Sample<br>N=2,332 | Cause-specific Hazard<br>(Rate of Discharge) |              | Subdistribution-Hazard<br>(Association With<br>Cumulative Incidence of<br>discharge) |              |
|------------------------------------------|-------------------------|----------------------------------------------|--------------|--------------------------------------------------------------------------------------|--------------|
| Factors                                  | n(%)                    | CSHR(CI)                                     | P value      | SDHR(CI)                                                                             | P value      |
| <b>General information</b>               |                         |                                              |              |                                                                                      |              |
| Age category<br>(more 5 years)           | 1,525(65.7)             | 1.048(0.968; 1.135)                          | 0.244        | 1.018(0.948; 1.094)                                                                  | 0.625        |
| Age taken                                | 2,323(99.6)             | 0.772(0.512; 1.163)                          | 0.213        | 0.756(0.507; 1.126)                                                                  | 0.168        |
| Sex (male)                               | 1,211(52.1)             | 0.980(0.914; 1.051)                          | 0.564        | 0.952(0.886; 1.022)                                                                  | 0.177        |
| Ward<br>(paediatric)                     | 1,179(50.6)             | 0.992(0.918; 1.073)                          | 0.843        | 1.039(0.967; 1.116)                                                                  | 0.302        |
| <b>Assessment on admission</b>           |                         |                                              |              |                                                                                      |              |
| Weight                                   | 1,146(49.1)             | 1.023(0.925; 1.131)                          | 0.657        | 1.063(0.967; 1.169)                                                                  | 0.206        |
| Pulse                                    | 1,618(69.4)             | 0.845(0.752; 0.950)                          | <b>0.005</b> | 0.869(0.777; 0.972)                                                                  | <b>0.014</b> |
| Temperature                              | 1,900(81.5)             | 0.816(0.722; 0.921)                          | <b>0.001</b> | 0.905(0.796; 1.030)                                                                  | 0.130        |
| Respiratory rate                         | 1,232(52.9)             | 0.806(0.713; 0.911)                          | <b>0.001</b> | 0.848(0.759; 0.946)                                                                  | <b>0.003</b> |
| Blood pressure                           | 1,046(44.9)             | 0.951(0.875; 1.034)                          | 0.234        | 0.936(0.865; 1.013)                                                                  | 0.102        |
| Fever complaint                          | 2,030(87.1)             | 0.955(0.817; 1.117)                          | 0.562        | 0.995(0.858; 1.154)                                                                  | 0.948        |
| <b>Monitoring during hospitalization</b> |                         |                                              |              |                                                                                      |              |
| Temperature                              | 1,953(83.7)             | 0.791(0.687; 0.910)                          | <b>0.001</b> | 0.862(0.742; 1.002)                                                                  | 0.053        |
| Respiratory rate                         | 1,349(57.8)             | 0.828(0.727; 0.943)                          | <b>0.005</b> | 0.874(0.775; 0.985)                                                                  | <b>0.027</b> |
| Blood pressure                           | 1,089(46.7)             | 0.958(0.885; 1.037)                          | 0.280        | 0.935(0.867; 1.007)                                                                  | 0.078        |
| Pulse rate                               | 1,696(72.7)             | 0.860(0.759; 0.973)                          | <b>0.017</b> | 0.886(0.782; 1.004)                                                                  | 0.058        |
| Oxygen                                   | 469(20.1)               | 0.820(0.718; 0.938)                          | <b>0.004</b> | 0.837(0.733; 0.955)                                                                  | <b>0.008</b> |

|                                                     |             |                     |                  |                     |                  |
|-----------------------------------------------------|-------------|---------------------|------------------|---------------------|------------------|
| saturation                                          |             |                     |                  |                     |                  |
| <b>Laboratory testing</b>                           |             |                     |                  |                     |                  |
| Malaria test done on admission                      | 2,155(92.4) | 1.046(0.880; 1.243) | 0.607            | 1.120(0.926; 1.354) | 0.242            |
| Hb/ HCT done                                        | 1,551(66.5) | 0.708(0.650; 0.771) | <b>&lt;0.001</b> | 0.738(0.678; 0.803) | <b>&lt;0.001</b> |
| Glucose/RBS test done                               | 582(25.0)   | 0.769(0.695; 0.850) | <b>&lt;0.001</b> | 0.733(0.673; 0.799) | <b>&lt;0.001</b> |
| <b>Clinical features</b>                            |             |                     |                  |                     |                  |
| At least one feature of severe malaria <sup>a</sup> | 762(32.7)   | 0.747(0.679;0.821)  | <b>&lt;0.001</b> | 0.696(0.626;0.774)  | <b>&lt;0.001</b> |
| <b>Diagnosis</b>                                    |             |                     |                  |                     |                  |
| HW's severe malaria diagnosis on admission          | 571(24.5)   | 1.063(0.953;1.186)  | 0.267            | 1.054(0.937;1.185)  | 0.380            |
| Confirmed severe malaria <sup>b</sup>               | 592(25.4)   | 1.219(1.090;1.362)  | <b>0.001</b>     | 1.214(1.082;1.362)  | <b>0.001</b>     |
| <b>Treatment during the hospitalization</b>         |             |                     |                  |                     |                  |
| Artesunate injection prescribed                     | 1,186(50.9) | 1.365(1.206; 1.545) | <b>&lt;0.001</b> | 1.339(1.184; 1.514) | <b>&lt;0.001</b> |

The bold values are those that are significant results (P <0.05)

<sup>a</sup> Documentation of at least one of the clinical and laboratory features as specified and defined in Table 1.

<sup>b</sup> Defined as positive malaria test on admission and presence of severity criteria (either documentation of any clinical features of severe malaria or severe malaria diagnosis made by clinician); Clinical severity criteria were complemented with health workers diagnosis of severe malaria to protect correctness of severity classification from documentation biases.
